# Supplementary material for: Effectiveness and Feasibility of Pharmacist-Driven Penicillin Allergy De-Labeling Pilot Program without Skin Testing or Oral Challenges
Source: MDPI journal article supplement (doi:10.3390/pharmacy9030127), 2021-07-20
Supplement: s1 [file s1]

## Supplementary Material

**Figure S1: Penicillin Allergy History Toolkit (Adapted from Shenoy et al. JAMA 321.2 (2019): 188-199)**

Agent/Route: \_\_\_\_\_ Date of Reaction \_\_\_\_\_

Reaction history (check all that apply):

| Risk Level                                                 | Reaction                                                                                                                                                                                                                                                                                                                                                                                                                                                                                                                                                                                                                                                                               |
|------------------------------------------------------------|----------------------------------------------------------------------------------------------------------------------------------------------------------------------------------------------------------------------------------------------------------------------------------------------------------------------------------------------------------------------------------------------------------------------------------------------------------------------------------------------------------------------------------------------------------------------------------------------------------------------------------------------------------------------------------------|
| Intolerance                                                | <input type="checkbox"/> Isolated GI upset (diarrhea, nausea, vomiting, abdominal pain)<br><input type="checkbox"/> Chills<br><input type="checkbox"/> Headache<br><input type="checkbox"/> Fatigue                                                                                                                                                                                                                                                                                                                                                                                                                                                                                    |
| Low risk                                                   | <input type="checkbox"/> Family history<br><input type="checkbox"/> Itching WITHOUT rash (pruritus)<br><input type="checkbox"/> Unknown, remote (>10 years ago) reaction<br><input type="checkbox"/> Patient denies allergy but is on record                                                                                                                                                                                                                                                                                                                                                                                                                                           |
| High risk<br>(potential IgE reactions)                     | <input type="checkbox"/> Anaphylaxis<br><input type="checkbox"/> Angioedema<br><input type="checkbox"/> Bronchospasm (chest tightness)<br><input type="checkbox"/> Cough<br><input type="checkbox"/> Nasal symptoms<br><input type="checkbox"/> Arrhythmia<br><input type="checkbox"/> Throat tightness<br><input type="checkbox"/> Hypotension<br><input type="checkbox"/> Flushing/redness<br><input type="checkbox"/> Shortness of breath<br><input type="checkbox"/> Rash, type of rash (if known): _____<br><input type="checkbox"/> Syncope/pass out<br><input type="checkbox"/> Wheezing<br><input type="checkbox"/> Dizzy/lightheadedness                                      |
| Severe risk<br>(potential severe none-immediate reactions) | <input type="checkbox"/> Steven-Johnson syndrome (rash with mucosal lesions)<br><input type="checkbox"/> Serum sickness (rash with joint pain, fever, myalgia)<br><input type="checkbox"/> Thrombocytopenia<br><input type="checkbox"/> Fever (not from infection)<br><input type="checkbox"/> Organ injury (liver, kidney)<br><input type="checkbox"/> Erythema multiforme (rash with target lesions)<br><input type="checkbox"/> Dystonia<br><input type="checkbox"/> Anemia<br><input type="checkbox"/> Acute generalized exanthematous (rash with pustules)<br><input type="checkbox"/> Drug reaction eosinophilia and systemic symptoms (rash with eosinophilia and organ injury) |
| Other                                                      | <input type="checkbox"/> Other symptoms not listed above: _____                                                                                                                                                                                                                                                                                                                                                                                                                                                                                                                                                                                                                        |
| Beta-lactam use                                            | <input type="checkbox"/> Penicillin or beta-lactam use after documented reactions/allergy (patient reported vs chart review):<br>Patient reported:<br>Chart review:                                                                                                                                                                                                                                                                                                                                                                                                                                                                                                                    |

History Taken by: \_\_\_\_\_ Date: \_\_\_\_\_

## Figure S2: Template to document in allergy section

Smartphrase: “.PCNALLERGYUNKNOWN”

Infectious Diseases pharmacist completed allergy assessment. Unable to determine risk. Patient has tolerated [LIST PREVIOUS TOLERATED AGENTS] in the past. Penicillin Allergy Factsheet handout by CDC was given. See progress note from pharmacist on [DATE].

Smartphrase: “.PCNALLERGYINTOLERANCE”

Infectious Diseases pharmacist completed allergy assessment. Allergy determined to be intolerance. It is safe to use [AGENT] for this patient. Patient has tolerated [LIST PREVIOUS TOLERATED AGENTS] in the past. Will likely tolerate [CEPHALOSPORINS], as these do not share side chains and risk for cross-reactivity is low. Penicillin Allergy Factsheet handout by CDC was given. See progress note from pharmacist on [DATE].

Smartphrase: “.PCNALLERGYLOWRISK”

Infectious Diseases pharmacist completed allergy assessment. Allergy determined to be low-risk. Patient has tolerated [LIST PREVIOUS TOLERATED AGENTS] in the past. Will likely tolerate [CEPHALOSPORINS], as these do not share side chains and risk for cross-reactivity is low. Penicillin Allergy Factsheet handout by CDC was given. This patient may be a good candidate for direct oral challenge. See progress note from pharmacist on [DATE].

Smartphrase: “.PCNALLERGYHIGHRISK”

Infectious Diseases pharmacist completed allergy assessment. Allergy determined to be high-risk. Patient has tolerated [LIST PREVIOUS TOLERATED AGENTS] in the past. Will likely tolerate [CEPHALOSPORINS], as these do not share side chains and risk for cross-reactivity is low. Penicillin Allergy Factsheet handout by CDC was given. See progress note from pharmacist on [DATE].

Smartphrase: “.PCNALLERGYSEVERERISK”

Infectious Diseases pharmacist completed allergy assessment. Allergy determined to be high-risk. Do not recommend skin testing or challenge. Patient has tolerated [LIST PREVIOUS TOLERATED AGENTS] in the past. Will likely tolerate [CEPHALOSPORINS], as these do not share side chains and risk for cross-reactivity is low. Penicillin Allergy Factsheet handout by CDC was given. See progress note from pharmacist on [DATE].

### Figure S3: Template progress note

Smartphrase: ".PCNALLERGYASSESSMENT"

Penicillin Allergy History Assessment

Assessment performed on [DATE] by [NAME, CREDENTIALS]

Patient name: \*\*\*

DOB: \*\*\*

Patient reported following reactions to [NAME OF PENICILLIN AGENT].

Intolerance: \*\*\*

Low risk: \*\*\*

Moderate-high risk: \*\*\*

High risk: \*\*\*

Other symptoms: \*\*\*

Penicillin Allergy Factsheet handout given: Y/N

Onset of symptoms after starting antibiotics was \*\*\* and patient received treatment with \*\*\* following the reaction. This reaction occurred \*\*\* (time frame) ago. PRIOR to this reaction, patient has tolerated \*\*\*. AFTER the reaction, patient has tolerated \*\*\* without complications.

Based on the history provided by the patient, this allergy has been deemed (low/intermediate/high) risk. Allergy list was updated to reflect this information.

Penicillin and cephalosporin allergies only show cross-reactivity if two agents have structural resemblance in side chains. Shown below are beta-lactam antibiotics with common side chains. Agents that do not share structural similarities in side chains do not have cross-reactivity. Refer to the table below and previously tolerated antibiotics in guiding antibiotic choice. This table was adopted from article by Zagursky et al. "Cross-reactivity in  $\beta$ -lactam allergy." Published in *The Journal of Allergy and Clinical Immunology: In Practice* 6.1 (2018): 72-81. to reflect products available in the US.

Date/time:

Name:

Phone: \*\*\*

Pager: \*\*\*

### Penicillin and Cephalosporin Side Chains<sup>3</sup>

|                | Nafcillin | Oxacillin | Dicloxacillin | Penicillin G/V | Piperacillin | Ampicillin | Amoxicillin | Cefadroxil | Cephalexin | Cefazolin | Cefoxitin | Cefuroxime | Cefotetan | Cefprozil | Cefaclor | Ceftibuten | Cefdinir | Cefixime | Ceftriaxone | Cefditoren | Cefotaxime | Cefpodoxime | Ceftazidime | Cefepime | Ceftaroline | Ceftolozane |
|----------------|-----------|-----------|---------------|----------------|--------------|------------|-------------|------------|------------|-----------|-----------|------------|-----------|-----------|----------|------------|----------|----------|-------------|------------|------------|-------------|-------------|----------|-------------|-------------|
| Nafcillin      |           |           |               |                |              |            |             |            |            |           |           |            |           |           |          |            |          |          |             |            |            |             |             |          |             |             |
| Oxacillin      |           |           | X             |                |              |            |             |            |            |           |           |            |           |           |          |            |          |          |             |            |            |             |             |          |             |             |
| Dicloxacillin  |           | X         |               |                |              |            |             |            |            |           |           |            |           |           |          |            |          |          |             |            |            |             |             |          |             |             |
| Penicillin G/V |           |           |               | X              | X            | X          | X           | X          | X          |           |           |            |           | X         | X        |            |          |          |             |            |            |             |             |          |             |             |
| Piperacillin   |           |           |               | X              | X            | X          | X           | X          | X          |           |           |            |           | X         | X        |            |          |          |             |            |            |             |             |          |             |             |
| Ampicillin     |           |           |               | X              | X            | X          | X           | X          | X          |           |           |            |           | X         | X        |            |          |          |             |            |            |             |             |          |             |             |
| Amoxicillin    |           |           |               | X              | X            | X          | X           | X          | X          |           |           |            |           | X         | X        |            |          |          |             |            |            |             |             |          |             |             |
| Cefadroxil     |           |           |               | X              | X            | X          | X           | X          | X          |           |           |            |           | X         | X        |            |          |          |             |            |            |             |             |          |             |             |
| Cephalexin     |           |           |               | X              | X            | X          | X           | X          | X          |           |           |            |           | X         | X        |            |          |          |             |            |            |             |             |          |             |             |
| Cefazolin      |           |           |               |                |              |            |             |            |            |           |           |            |           |           |          |            |          |          |             |            |            |             |             |          |             |             |
| Cefoxitin      |           |           |               |                |              |            |             |            |            |           |           | X          |           |           |          |            |          |          |             |            | X          |             |             |          |             |             |
| Cefuroxime     |           |           |               |                |              |            |             |            |            |           | X         | X          |           |           |          |            |          |          | X           | X          | X          | X           |             | X        | X           |             |
| Cefotetan      |           |           |               |                |              |            |             |            |            |           |           |            |           |           |          |            |          |          | X           | X          | X          |             |             |          |             |             |
| Cefprozil      |           |           |               | X              | X            | X          | X           | X          | X          |           |           |            |           |           | X        |            |          |          |             |            |            |             |             |          |             |             |
| Cefaclor       |           |           |               | X              | X            | X          | X           | X          | X          |           |           |            |           | X         |          |            |          |          |             |            |            |             |             |          |             |             |
| Ceftibuten     |           |           |               |                |              |            |             |            |            |           |           |            |           |           |          |            | X        | X        | X           | X          | X          | X           | X           | X        | X           |             |
| Cefdinir       |           |           |               |                |              |            |             |            |            |           |           |            |           |           |          |            | X        | X        | X           | X          | X          | X           | X           | X        | X           |             |
| Cefixime       |           |           |               |                |              |            |             |            |            |           |           | X          |           |           |          |            | X        | X        | X           | X          | X          | X           | X           | X        | X           |             |
| Ceftriaxone    |           |           |               |                |              |            |             |            |            |           |           | X          |           |           |          |            | X        | X        | X           | X          | X          | X           | X           | X        | X           |             |
| Cefditoren     |           |           |               |                |              |            |             |            |            |           |           | X          |           |           |          |            | X        | X        | X           | X          | X          | X           | X           | X        | X           |             |
| Cefotaxime     |           |           |               |                |              |            |             |            |            |           | X         | X          |           |           |          |            | X        | X        | X           | X          | X          | X           | X           | X        | X           |             |
| Cefpodoxime    |           |           |               |                |              |            |             |            |            |           |           | X          |           |           |          |            | X        | X        | X           | X          | X          | X           | X           | X        | X           |             |
| Ceftazidime    |           |           |               |                |              |            |             |            |            |           |           |            |           |           |          |            | X        | X        | X           | X          | X          | X           | X           | X        | X           |             |
| Cefepime       |           |           |               |                |              |            |             |            |            |           |           | X          |           |           |          |            | X        | X        | X           | X          | X          | X           | X           | X        | X           |             |
| Ceftaroline    |           |           |               |                |              |            |             |            |            |           |           |            |           |           |          |            | X        | X        | X           | X          | X          | X           | X           | X        | X           |             |
| Ceftolozane    |           |           |               |                |              |            |             |            |            |           |           |            |           |           |          |            | X        | X        | X           | X          | X          | X           | X           | X        | X           |             |

|          |                                                                 |          |                                                                      |          |                                                             |  |                                                                           |
|----------|-----------------------------------------------------------------|----------|----------------------------------------------------------------------|----------|-------------------------------------------------------------|--|---------------------------------------------------------------------------|
| <b>X</b> | = highest risk of cross-reactivity, fully identical side chains | <b>X</b> | = moderate risk of cross-reactivity, partially identical side chains | <b>X</b> | = low risk of cross-reactivity, similarities in side chains |  | = no similarities in side chains, very low to no risk of cross-reactivity |
|----------|-----------------------------------------------------------------|----------|----------------------------------------------------------------------|----------|-------------------------------------------------------------|--|---------------------------------------------------------------------------|
